# Supplementary material for: GNA13 as a prognostic factor and mediator of gastric cancer progression
Source: PubMed Central journal article supplement (PMC4826215; doi:10.18632/oncotarget.6780), 2015-12-28
Supplement: oncotarget-07-4414-s001.pdf [file oncotarget-07-4414-s001.pdf]

## GNA13 as a prognostic factor and mediator of gastric cancer progression

### Supplementary Materials

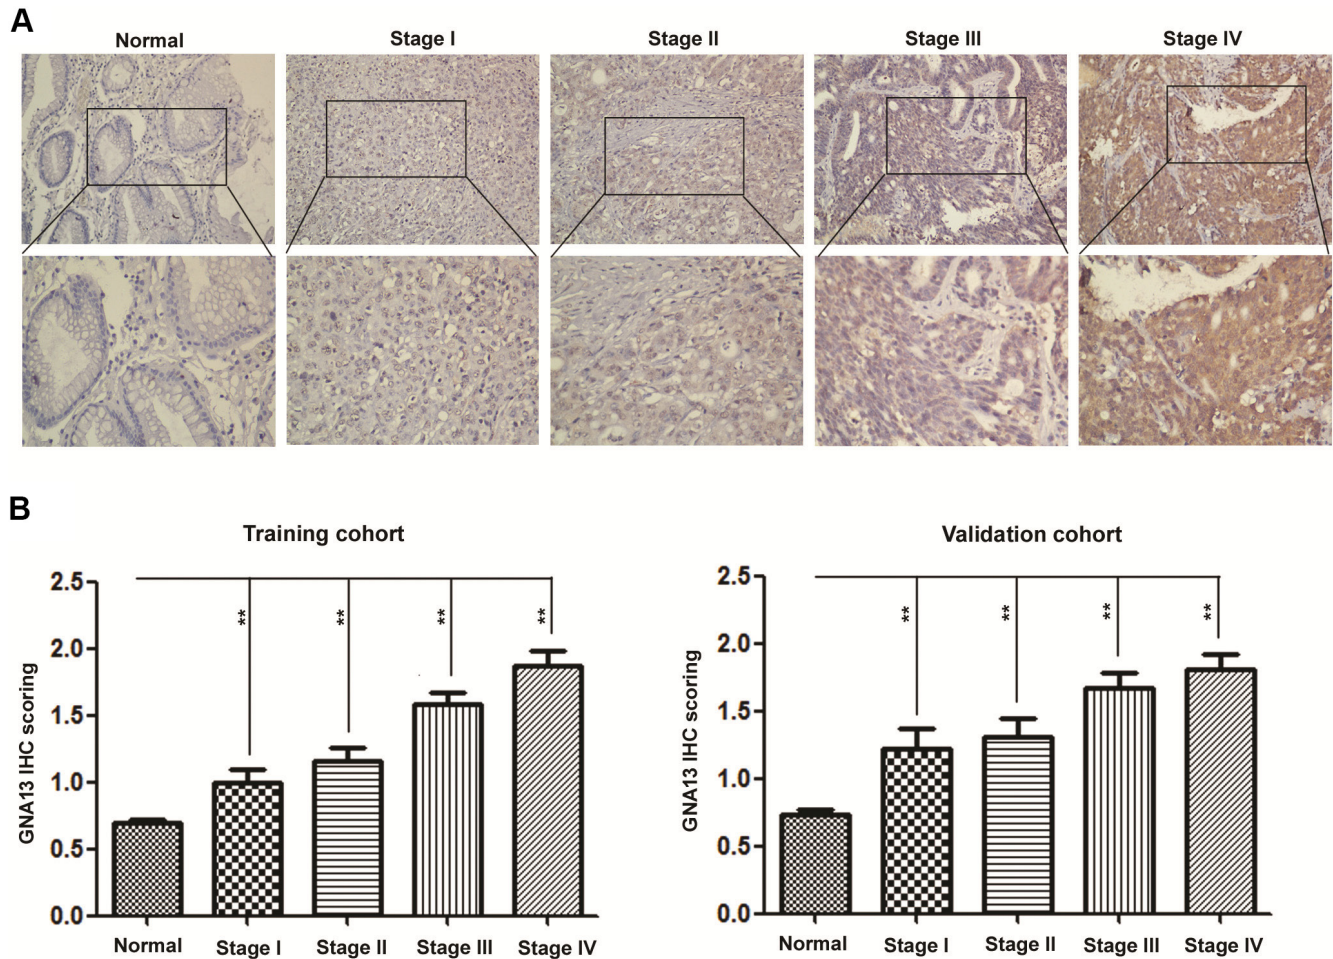

**Supplementary Figure S1: GNA13 expression in gastric cancer tissues was positively associated with clinical stage.** (A) The representative images of GNA13 IHC staining as tumor stage increased. (B) The IHC scoring of GNA13 staining increases as tumor stage increased ( $P < 0.001$ ). \* $P < 0.05$ ; \*\* $P < 0.01$ .

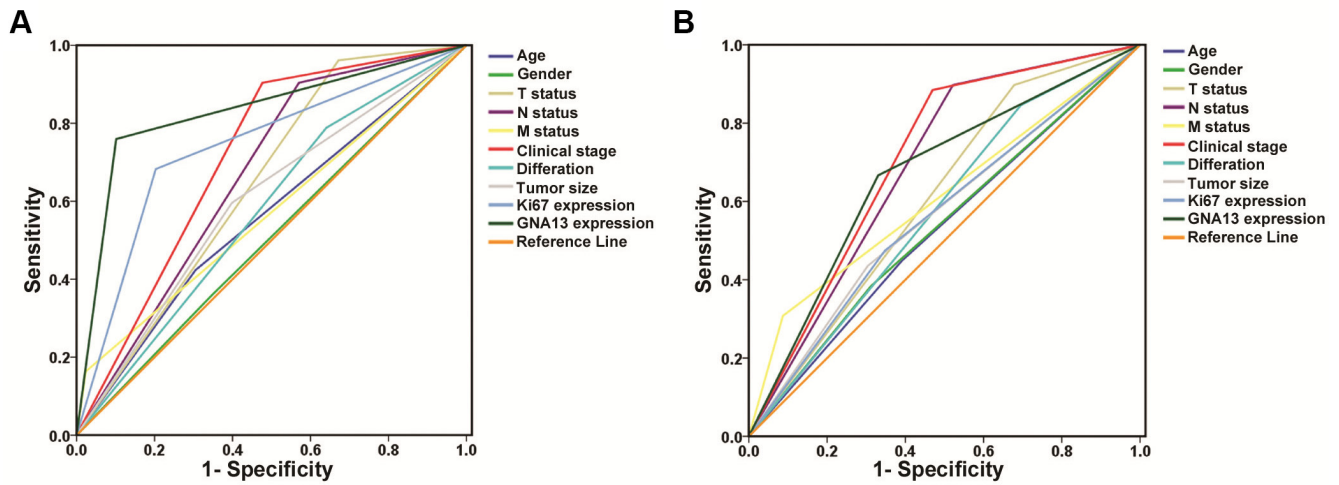

**Supplementary Figure S2: ROC curve analysis for different clinicopathological features and GNA13 expression was performed to evaluate the survival status. (A)** Age (AUC = 0.559;  $P = 0.121$ ), gender (AUC = 0.506;  $P = 0.875$ ), T statue (AUC = 0.645;  $P < 0.001$ ), N statue (AUC = 0.667;  $P < 0.001$ ), M statue (AUC = 0.570;  $P = 0.067$ ), clinical stage (AUC = 0.714;  $P < 0.001$ ), differentiation (AUC = 0.574;  $P = 0.053$ ), tumor size (AUC = 0.599;  $P = 0.010$ ), Ki67 expression (AUC = 0.740;  $P < 0.001$ ), and GNA13 expression (AUC = 0.829;  $P < 0.001$ ) implied statistical associations with survival in the training cohort. **(B)** Age (AUC = 0.529;  $P = 0.499$ ), gender (AUC = 0.536;  $P = 0.399$ ), T statue (AUC = 0.610;  $P = 0.010$ ), N statue (AUC = 0.688;  $P < 0.001$ ), M statue (AUC = 0.610;  $P = 0.009$ ), clinical stage (AUC = 0.708;  $P < 0.001$ ), differentiation (AUC = 0.575;  $P = 0.076$ ), tumor size (AUC = 0.566;  $P = 0.121$ ), Ki67 expression (AUC = 0.563;  $P = 0.136$ ), and GNA13 expression (AUC = 0.668;  $P < 0.001$ ) were used to test the survival status in validation cohort.

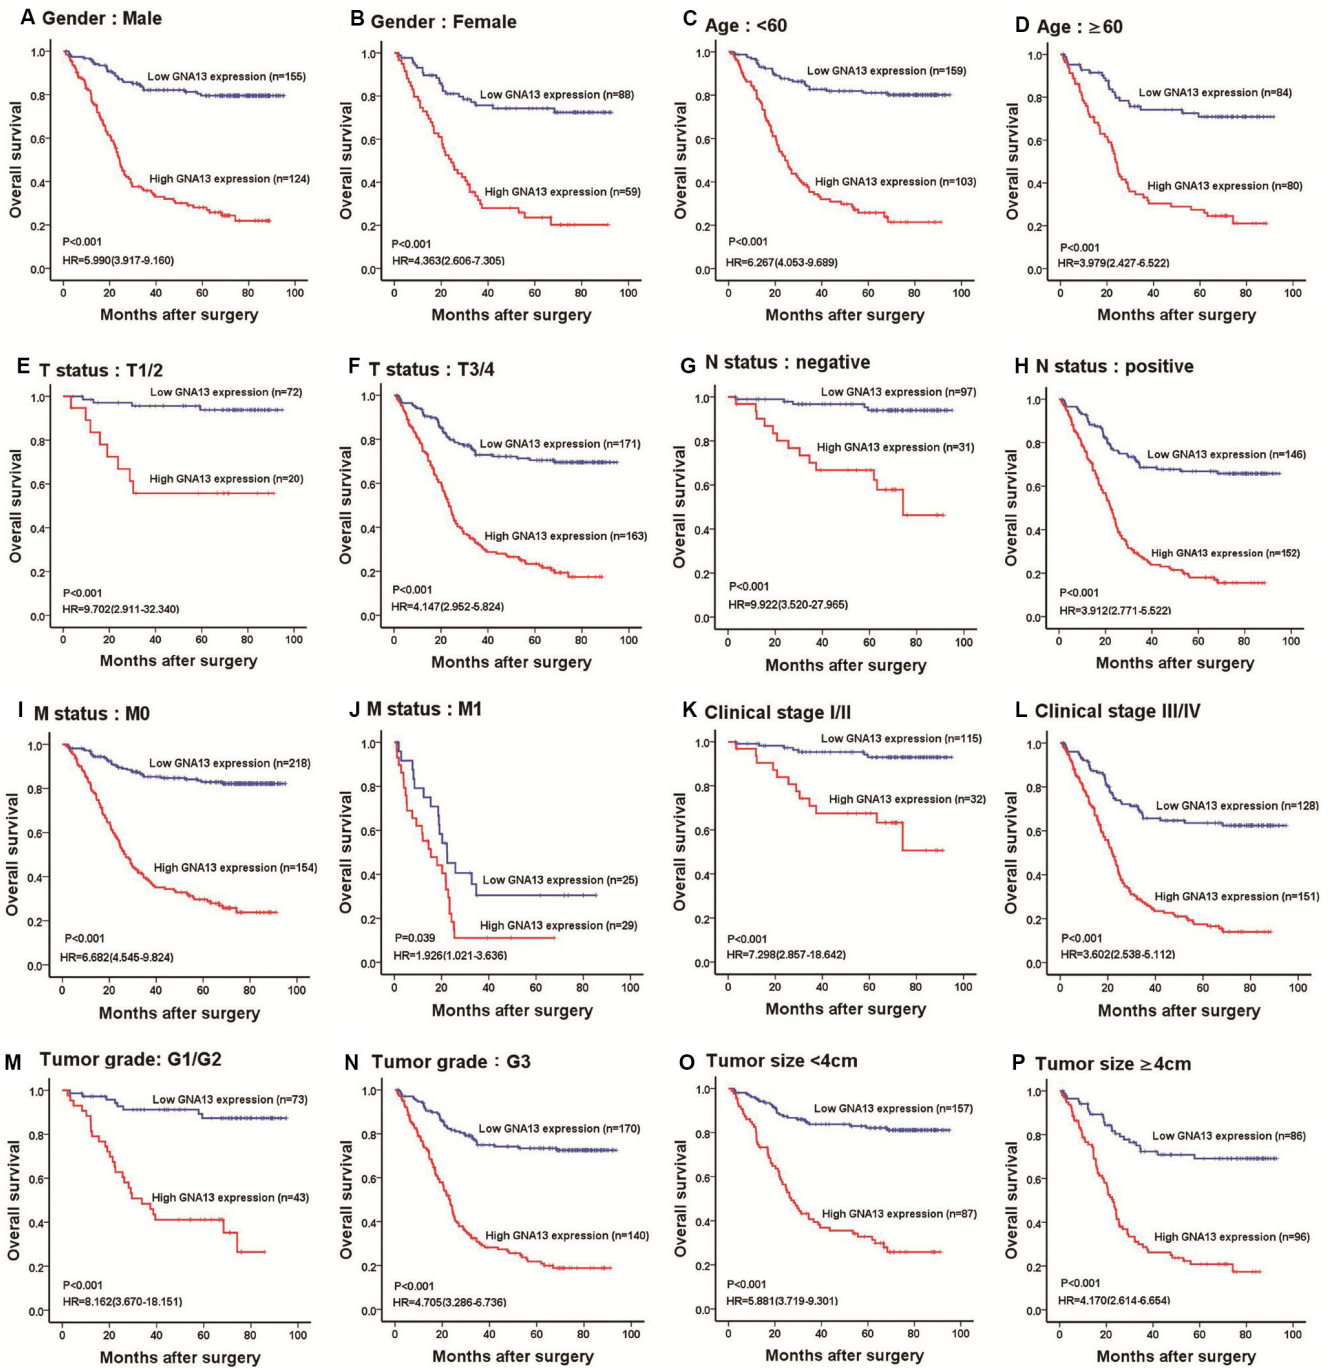

**Supplementary Figure S3: Kaplan-Meier overall survival curves and log-rank test in GC patients stratified by Age (A and B), Gender (C and D), T statue (E and F), N statue (G and H), M statue (I and J), Clinical stage (K and L), Tumor grade (M and N), and Tumor size (O and P).**

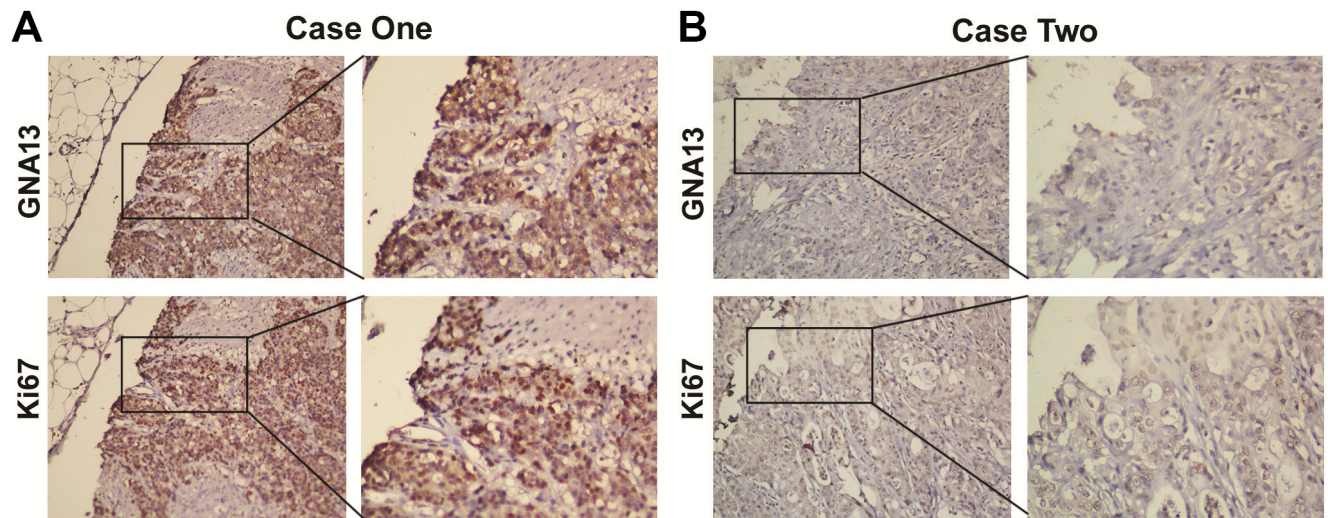

**Supplementary Figure S4: GNA13 expression in gastric cancer tissues was positively associated with Ki-67 index.** (A) High GNA13 IHC staining for GNA13 and Ki-67 were observed in the same GC tissues. (B) One GC sample showed both weak GNA13 and Ki-67 expression.

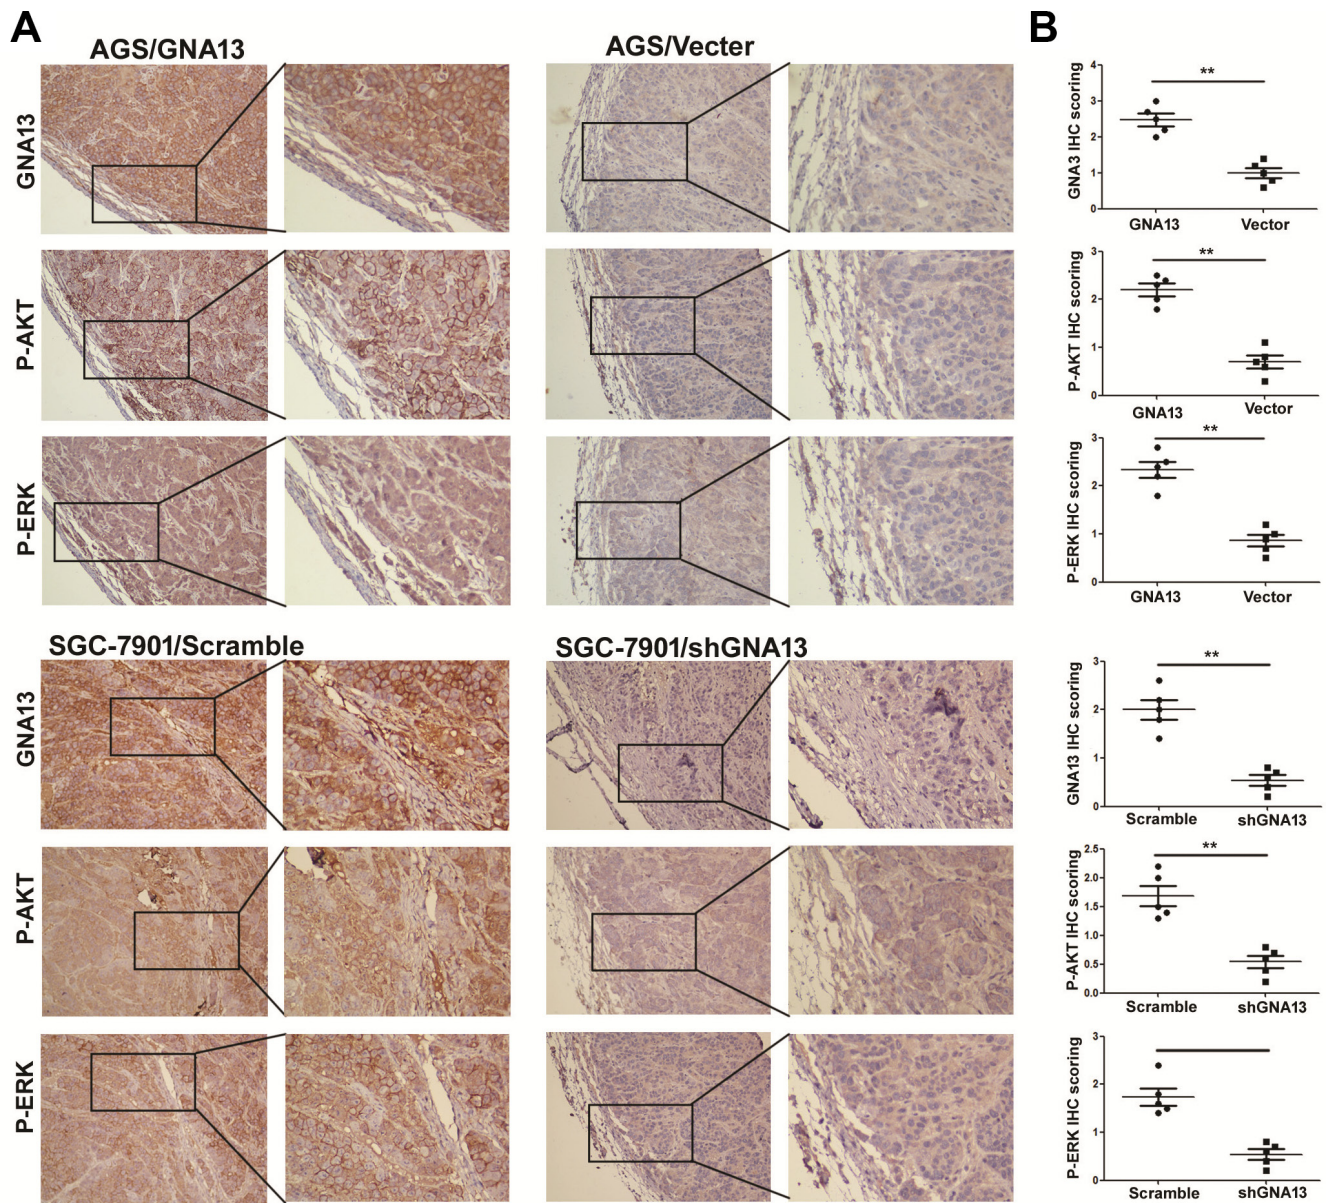

**Supplementary Figure S5: The effects of GNA13 on the p-AKT and p-ERK protein levels *in vivo*.** (A) The protein levels in GC tissues of the subcutaneous implantation nude mice models bearing GC were detected by IHC staining. (B) IHC scores for p-AKT and p-ERK were obviously increased in GNA13 transfected group, while decreased in GNA13 shRNA-infected cells. \* $P < 0.05$ ; \*\* $P < 0.01$ .

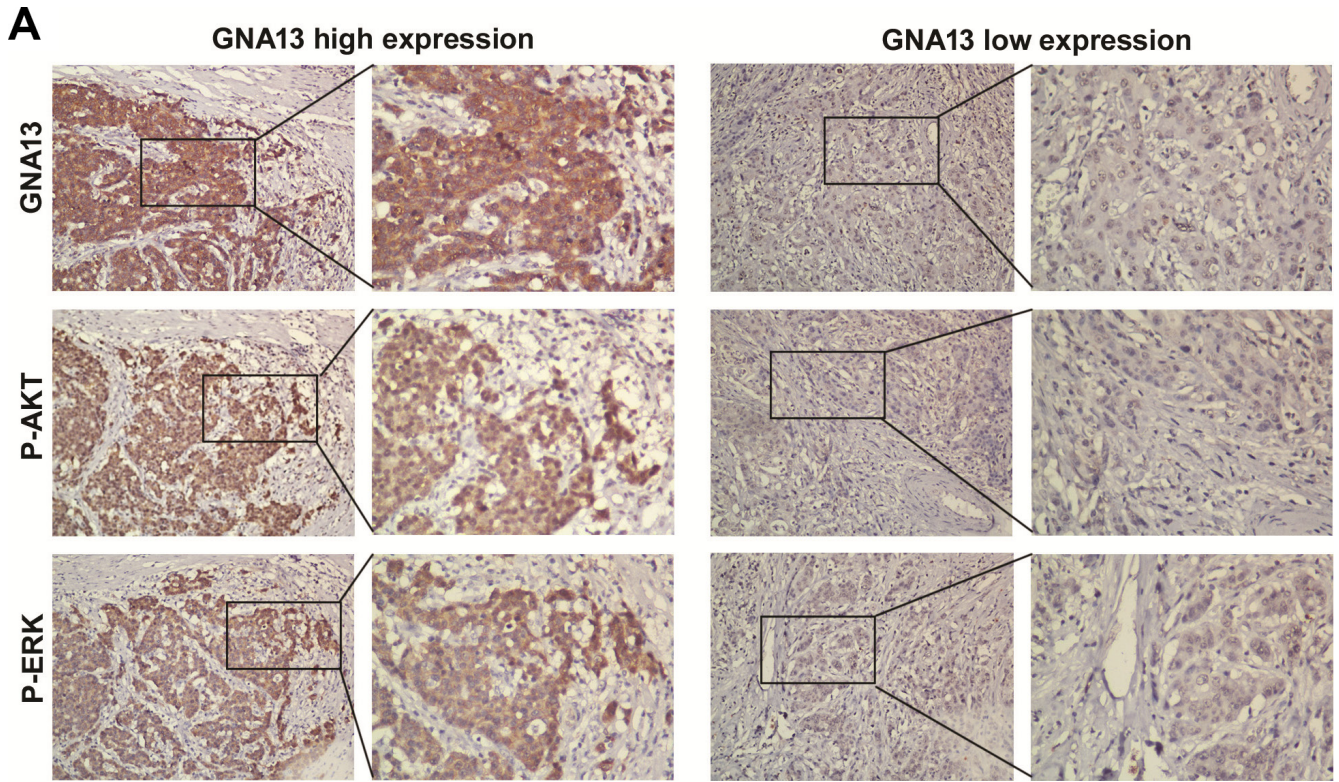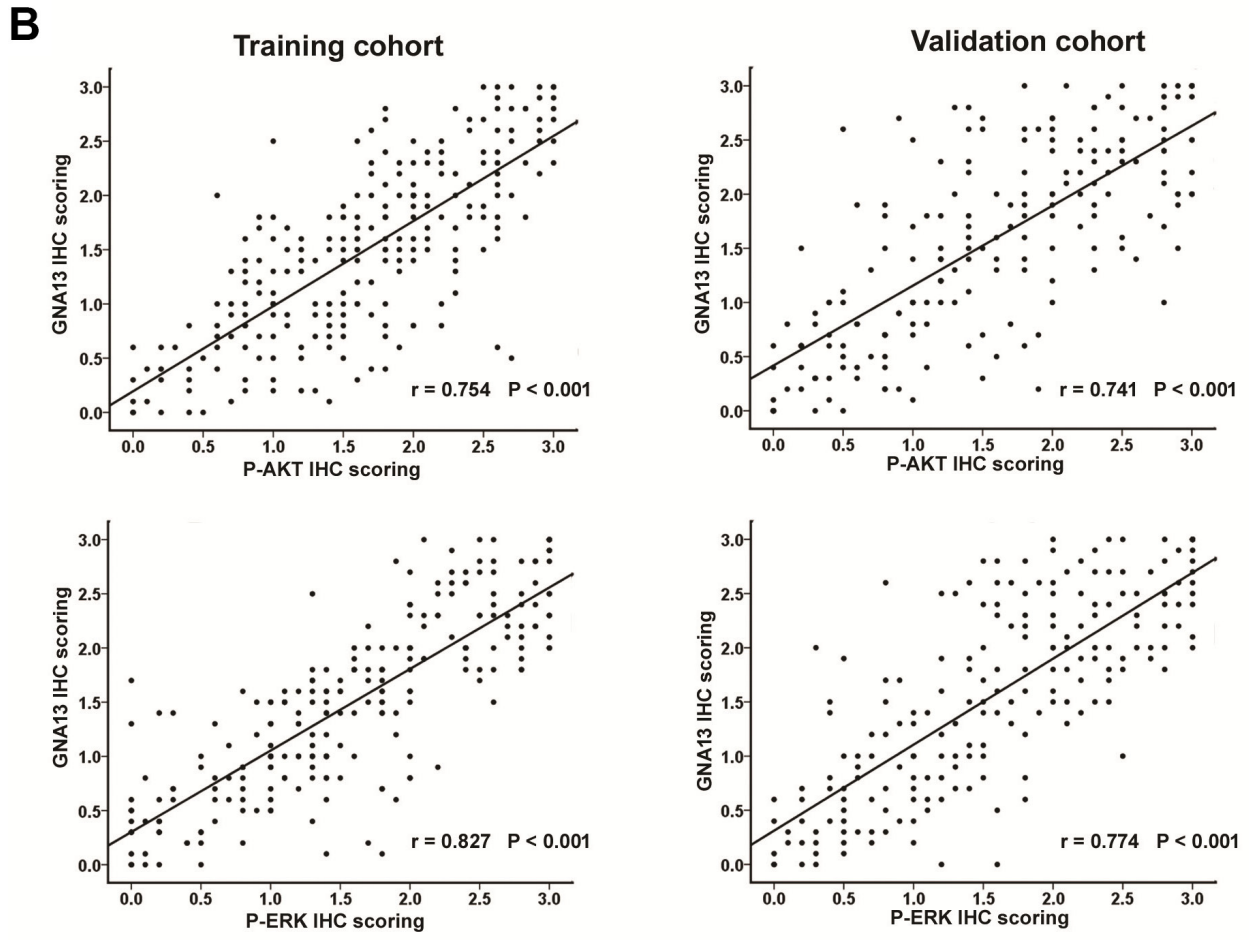

**Supplementary Figure S6: The association of GNA13 and p-AKT, p-ERK in GC samples. (A)** IHC Staining intensities for p-AKT and p-ERK were significantly reduced in low-GNA13 expressing (right) GC tissues than those with high-GNA13 levels (left). **(B)** The expression of GNA13 was significantly correlated with the expression of p-AKT and p-ERK in GC samples.

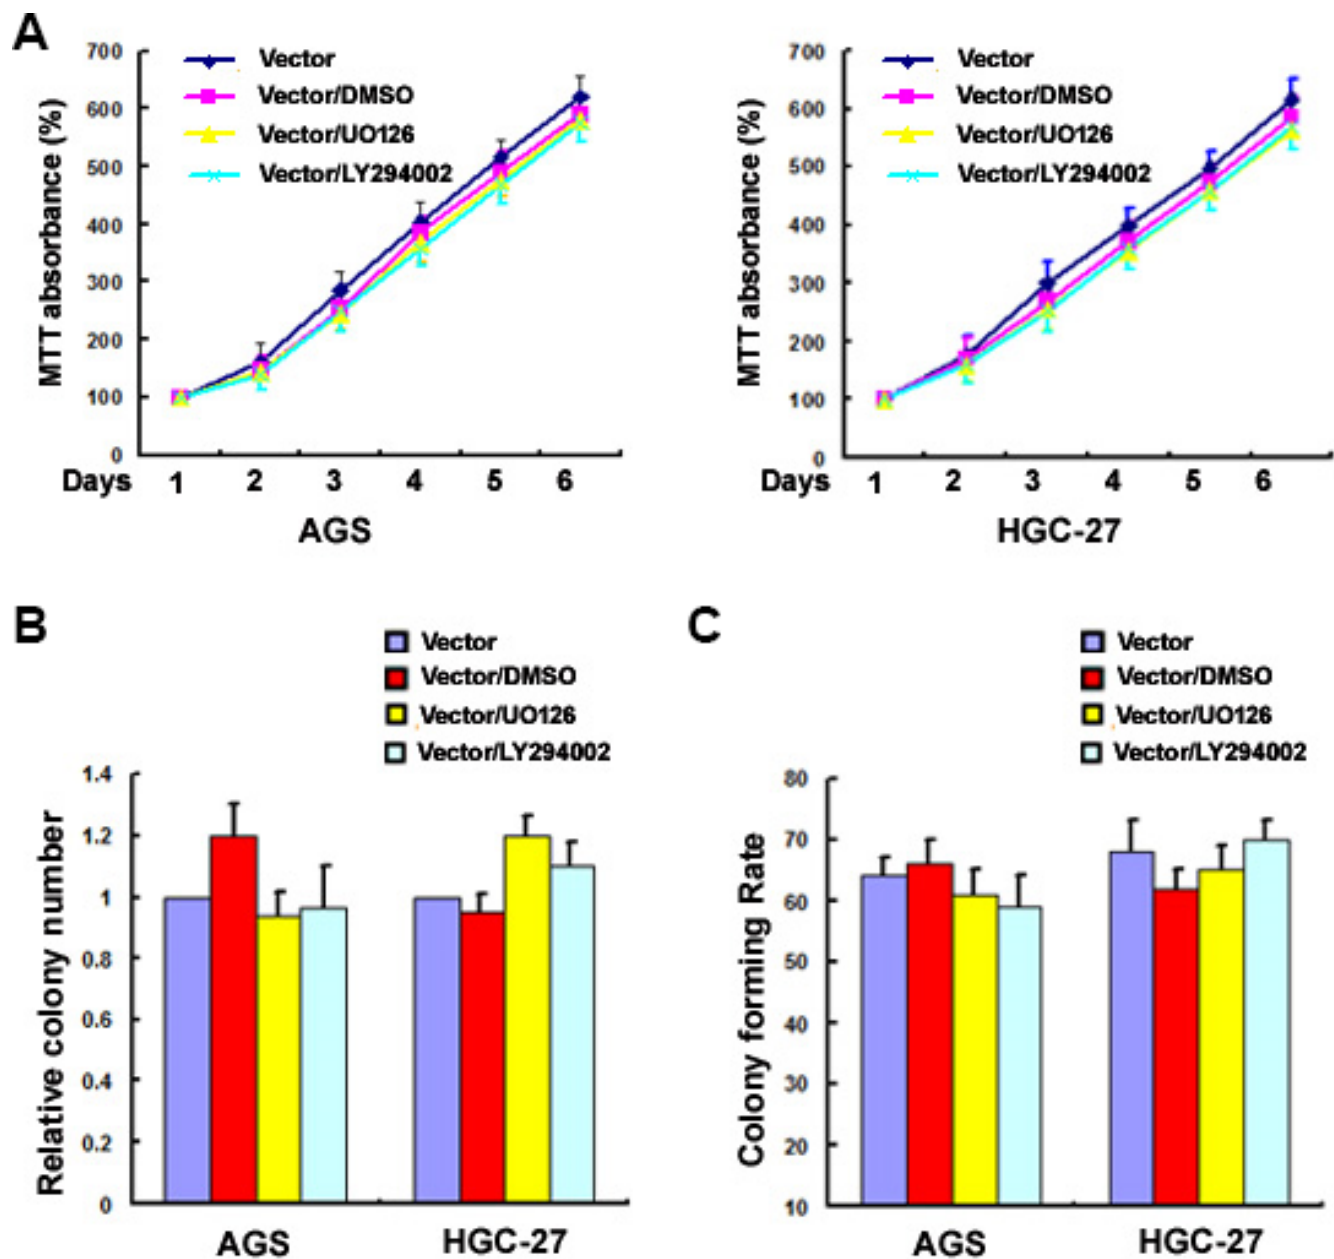

Supplementary Figure S7: The inhibition of PI3K/AKT and MAPK/ERK signaling pathway has no obvious effect on GC vector control cells. AGS/Vector and HGC-27/Vector proliferation and tumorigenicity were determined by MTT (A), colony formation assays (B) and anchorage-independent growth assay (C) after treatment with LY294002, U0126 or DMSO. \* $P < 0.05$ ; \*\* $P < 0.01$ .

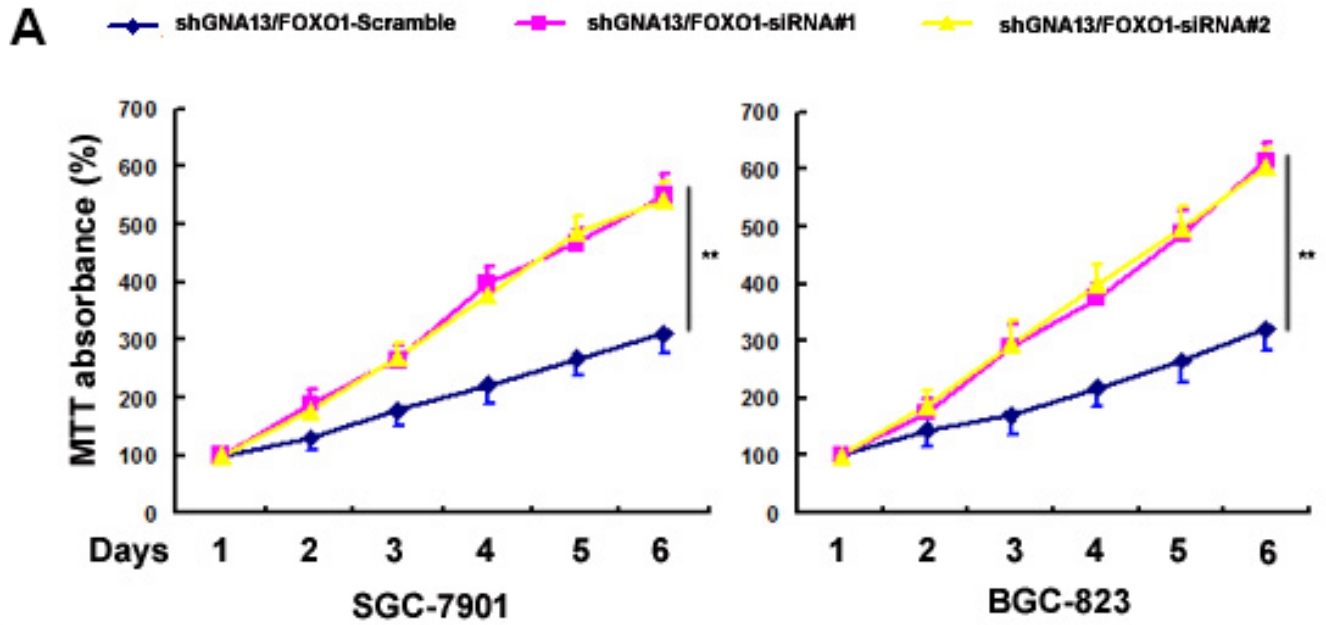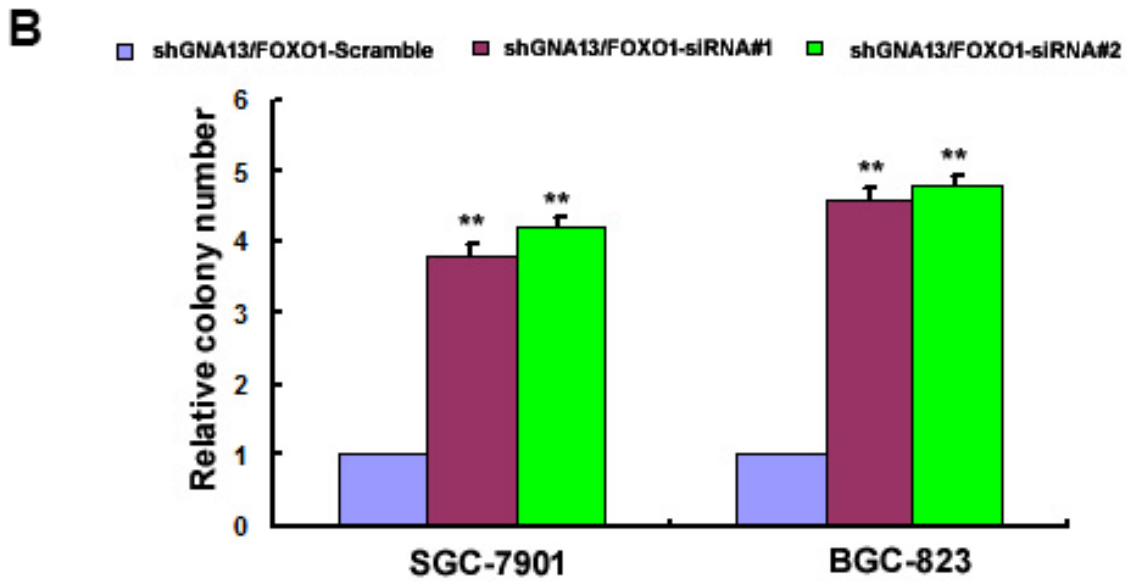

**Supplementary Figure S8: Silencing FOXO1 increased the proliferation of GNA13 shRNA(s)-infected cells.** Colony formation assays (A) and MTT assays (B) showed that silencing FOXO1 increased the proliferation of GNA13 shRNA(s)-infected GC cells.



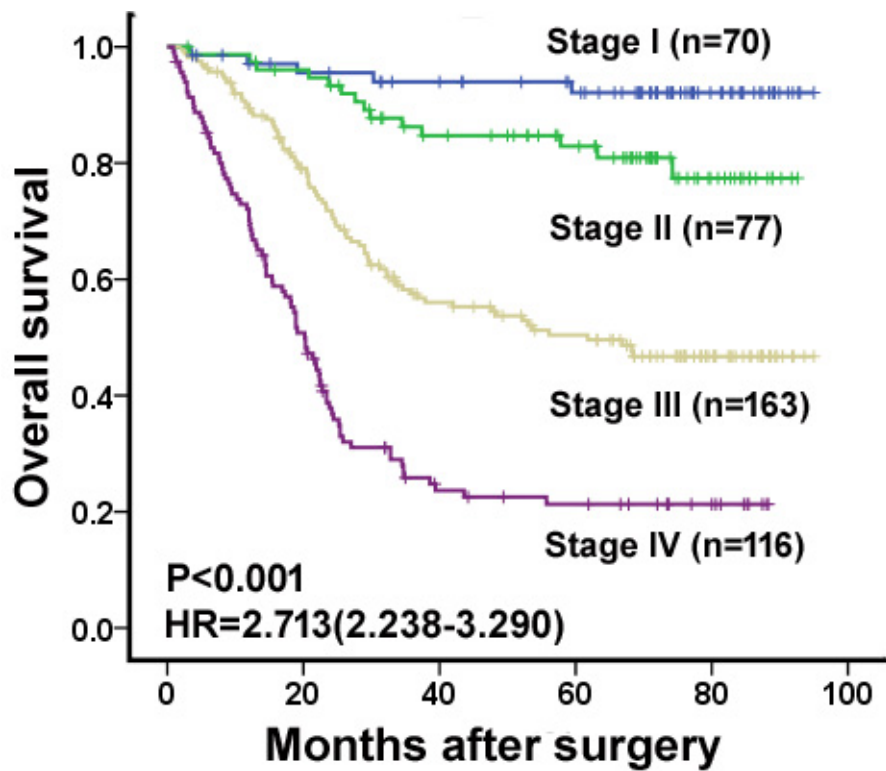

Supplementary Figure S9: Kaplan-Meier overall survival curves according to clinical stage.

**Supplementary Table S1: Association of GNA13 expression with GC patients' clinicopathological features**

| Variables        | GNA13 expression level |                |                 |                |                   |                |                 |                |
|------------------|------------------------|----------------|-----------------|----------------|-------------------|----------------|-----------------|----------------|
|                  | Training cohort        |                |                 |                | Validation cohort |                |                 |                |
|                  | Case                   | Low expression | High expression | <i>P</i> value | Case              | Low expression | High expression | <i>P</i> value |
| Age              |                        | 140            | 93              |                |                   | 103            | 90              |                |
| < 60yr           | 149                    | 95             | 54              |                | 113               | 64             | 49              |                |
| ≥ 60yr           | 84                     | 45             | 39              | 0.127          | 80                | 39             | 41              | 0.279          |
| Gender           |                        |                |                 |                |                   |                |                 |                |
| Male             | 152                    | 88             | 64              |                | 127               | 67             | 60              |                |
| Female           | 81                     | 52             | 29              | 0.350          | 66                | 36             | 30              | 0.813          |
| T statue         |                        |                |                 |                |                   |                |                 |                |
| T1/2             | 47                     | 40             | 7               |                | 45                | 32             | 13              |                |
| T3/4             | 186                    | 100            | 86              | < 0.001        | 148               | 71             | 77              | 0.006          |
| N                |                        |                |                 |                |                   |                |                 |                |
| N0               | 65                     | 54             | 11              |                | 63                | 43             | 20              |                |
| N1/2             | 168                    | 86             | 82              | < 0.001        | 130               | 60             | 70              | 0.004          |
| M                |                        |                |                 |                |                   |                |                 |                |
| M0               | 213                    | 132            | 81              |                | 159               | 86             | 73              |                |
| M1               | 20                     | 8              | 12              | 0.055          | 34                | 17             | 17              | 0.665          |
| Clinical stage   |                        |                |                 |                |                   |                |                 |                |
| I/II             | 77                     | 66             | 11              |                | 70                | 49             | 21              |                |
| III/IV           | 156                    | 74             | 82              | < 0.001        | 123               | 54             | 69              | < 0.001        |
| Grade            |                        |                |                 |                |                   |                |                 |                |
| G1/2             | 69                     | 46             | 23              |                | 47                | 27             | 20              |                |
| G3               | 164                    | 94             | 70              | 0.183          | 146               | 76             | 70              | 0.519          |
| Tumor size       |                        |                |                 |                |                   |                |                 |                |
| < 4cm            | 120                    | 82             | 38              |                | 124               | 75             | 49              |                |
| ≥ 4cm            | 113                    | 58             | 55              | 0.008          | 69                | 28             | 41              | 0.008          |
| Ki-67 expression |                        |                |                 |                |                   |                |                 |                |
| < 50%            | 135                    | 122            | 13              |                | 116               | 87             | 29              |                |
| ≥ 50%            | 98                     | 18             | 80              | < 0.001        | 77                | 16             | 61              | < 0.001        |

GC, gastric cancer

**Supplementary Table S2: Clinicopathological characteristics of 426 GC patients in training and validation cohort**

|                       | Number of cases (%) |                   |
|-----------------------|---------------------|-------------------|
|                       | Training cohort     | Validation cohort |
| <b>Age</b>            |                     |                   |
| < 60yr                | 149 (63.9)          | 113 (58.5)        |
| ≥ 60yr                | 84 (36.1)           | 80 (41.6)         |
| <b>Gender</b>         |                     |                   |
| Male                  | 152 (65.2)          | 127 (65.8)        |
| Female                | 81 (34.8)           | 66 (34.2)         |
| <b>T statue</b>       |                     |                   |
| T1/2                  | 47 (20.2)           | 45 (23.3)         |
| T3/4                  | 186 (79.8)          | 148 (76.7)        |
| <b>N statue</b>       |                     |                   |
| N0                    | 65 (27.9)           | 63 (32.6)         |
| N1/2                  | 168 (72.1)          | 130 (67.4)        |
| <b>M statue</b>       |                     |                   |
| M0                    | 213 (91.4)          | 159 (82.4)        |
| M1                    | 20 (8.6)            | 34 (17.6)         |
| <b>Clinical stage</b> |                     |                   |
| I/II                  | 77 (33.0)           | 70 (36.3)         |
| III/IV                | 156 (67.0)          | 123 (63.7)        |
| <b>Grade</b>          |                     |                   |
| G1/2                  | 69 (29.6)           | 47 (24.4)         |
| G3                    | 164 (70.4)          | 146 (75.6)        |
| <b>Tumor size</b>     |                     |                   |
| < 4 cm                | 120 (51.5)          | 124 (64.2)        |
| ≥ 4 cm                | 113 (48.5)          | 69 (35.8)         |
| <b>Vital status</b>   |                     |                   |
| Alive                 | 128 (54.9)          | 115 (59.6)        |
| Death                 | 105 (45.1)          | 78 (40.4)         |
| <b>Therapy</b>        |                     |                   |
| Surgery only          | 108 (45.1)          | 84 (43.5)         |
| Surgery + CT          | 125 (54.9)          | 109 (56.5)        |

GC, gastric cancer; CT, chemotherapy

**Supplementary Table S3: Sequences for primers used in this study**

|              |                                  |
|--------------|----------------------------------|
| GNA13-OE-F1  | TTATTGGTACCATGGCGGACTTCCTGCCGTC  |
| GNA13-OE-R1  | CTCACTCTAGAATCACTGTAGCATAAGCTGCT |
| GNA13-qPF    | TCGGGAAAAGACCTATGTGAA            |
| GNA13-qPR    | CAACCAGCACCCCTCATACCT            |
| cyclinD1-qPF | TCTGTGCCACAGATGTGAAG             |
| cyclinD1-qPR | AGCGTGTGAGGCGGTAGTAG             |
| p21-qPF      | GATGTGCCTATGGTCCTAGT             |
| p21-qPR      | CATCGTCAACACCCTGTCTT             |
| p27-qPF      | GCGGCAGAAGATTCTTCTTCG            |
| p27-qPR      | TGCTCCACAGTGCCAGCATT             |
| Ki67-qPF     | CATCAAGGAACAGCCTCAAC             |
| Ki67-qPR     | GTTGACTTCGGCTGATAGAC             |
| GAPDH-qPF    | CCCACATGGCCTCCAAGGAGTA           |
| GAPDH-qPR    | GTGTACATGGCAACTGTGAGGAGG         |
